# Supplementary material for: Investigating the nano-scale structure and composition dynamics during the phase transition towards complete separation of CeO2–ZrO2 solid solutions
Source: Royal Society of Chemistry journal article supplement (doi:10.1039/d4ta02923b), 2024-01-01
Supplement: d4ta02923b1.pdf [file d4ta02923b1.pdf]

## Supplementary

# Investigating the Nano-Scale Structure and Composition Dynamics During the Phase Transition Towards Complete Separation of CeO<sub>2</sub>-ZrO<sub>2</sub> Solid Solution

*Seol Hee Oh*<sup>1, §</sup>, *Hyun-Kyu Kim*<sup>2, §</sup>, *Sun-Young Park*<sup>3, §</sup>, *Yeong-Cheol Kim*<sup>2</sup>, *Deok-Hwang Kwon*<sup>1</sup>, *Sungeun Yang*<sup>1,4</sup>, *Ho-Il Ji*<sup>1,4</sup>, *Hye Jung Chang*<sup>1</sup>, *Kyung Joong Yoon*<sup>1</sup>, *Ji-Won Son*<sup>1</sup> and *Jong-Ho Lee*<sup>1,4 \*</sup>

<sup>1</sup>Energy Materials Research Center, Korea Institute of Science and Technology, Seoul 02792,  
Korea

<sup>2</sup>School of Energy Materials and Chemical Engineering, Korea University of Technology and  
Education, Cheonan 31253, Korea

<sup>3</sup>Technology Support Center, Korea Institute of Science and Technology, Seoul 02792, Korea

<sup>4</sup>Division of Nanoscience & Technology, University of Science and Technology, Seoul  
02792, Korea

\*E-mail of the Corresponding Author: [jongho@kist.re.kr](mailto:jongho@kist.re.kr)

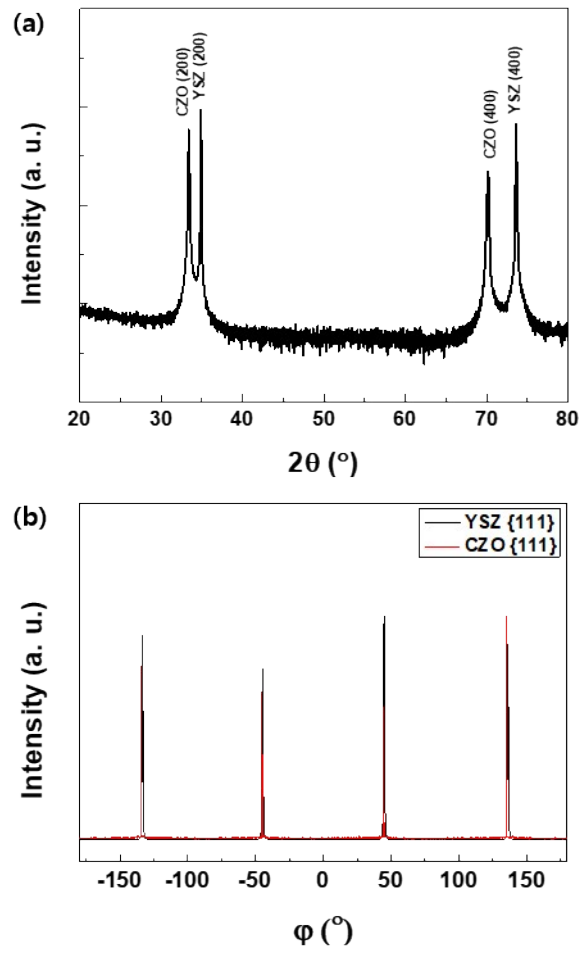

**Figure S1.** (a) Out-of-plane and (b) in-plane X-ray diffraction patterns of the epitaxially grown CZO thin films on YSZ (100) substrates.

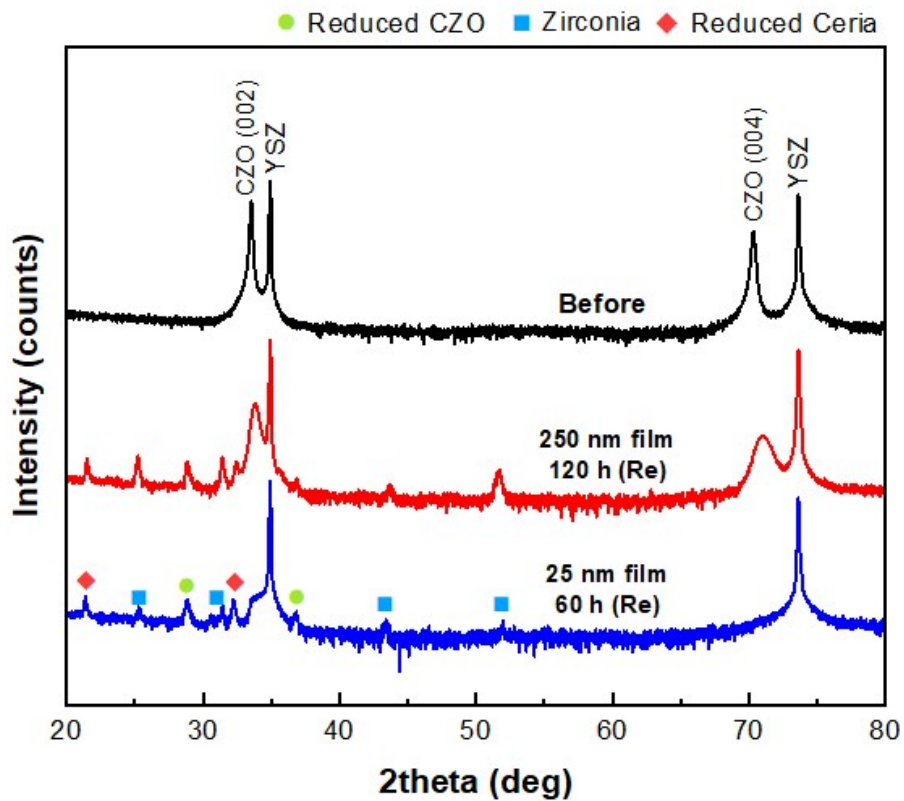

**Figure S2.** XRD spectra of the CZO thin film exposed to a reducing atmosphere at 1000°C

As illustrated in Figure S1, the original diffraction peak of the CZO thin film decreased significantly after heat treatment at 1000°C in a reducing atmosphere, with peaks for Ce oxide and Zr oxide appearing. This phase evolution was more pronounced in very thin films (~25 nm thick), where the CZO peak nearly vanished, leaving predominantly separated phases.

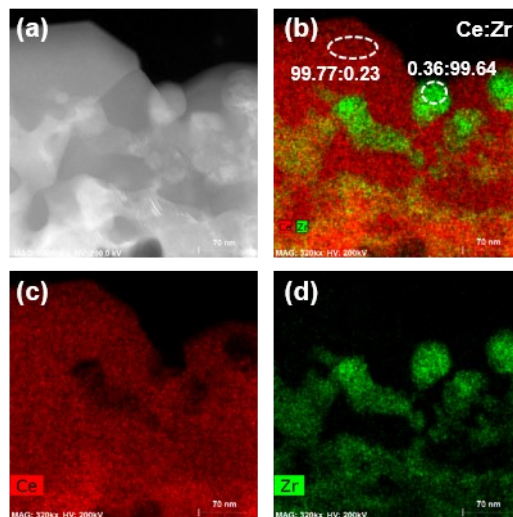

**Figure S3.** Observation of the completely decomposed phases in the high magnification (a) STEM image and (b-d) corresponding elemental mapping images at the surface of thin film reduced for 120 hr.
